# Supplementary material for: Platelet PD-L1 suppresses anti-cancer immune cell activity in PD-L1 negative tumors
Source: PubMed Central journal article supplement (PMC7652857; doi:10.1038/s41598-020-76351-4), 2020-11-09

## **Platelet PD-L1 suppresses anti-cancer immune cell activity in**

### **PD-L1 negative tumors**

Zaslavsky A.<sup>1,2\*</sup>, Adams M.P.<sup>1,2</sup>, Cao X.<sup>1,2</sup>, Maj T.<sup>3</sup>, Choi JE<sup>2,4</sup>, Judith Stangl-Kremser<sup>1,6</sup>,  
Patel S.<sup>1,2</sup>, Putelo A.<sup>1,2</sup>, Lee S.<sup>1,2</sup>, Nallandhighal S.<sup>1,2</sup>, Kasputis A.<sup>1,2</sup>, Alva A.<sup>2,3</sup>, Lew M<sup>7</sup>, Qin A.<sup>3</sup>,  
Mehra R.<sup>7</sup>, Morgan T.M.<sup>1,2</sup>, Salami S.<sup>1,2</sup>, Reichert Z.<sup>2,3</sup>, Udager A.<sup>7</sup>,  
Zou W.<sup>4</sup>, Palapattu G.S.<sup>1,2,6\*</sup>

<sup>1</sup>Department of Urology, University of Michigan, Ann Arbor, MI.

<sup>2</sup>Rogel Cancer Center, University of Michigan, Ann Arbor, MI.

<sup>3</sup>Department of Internal Medicine, Division of Hematology/Oncology, University of Michigan, Ann Arbor, MI.

<sup>4</sup>Department of Surgery, University of Michigan, Ann Arbor, MI.

<sup>5</sup>Michigan Center for Translational Pathology, University of Michigan, Ann Arbor, MI.

<sup>6</sup>Department of Urology, Medical University of Vienna, Vienna, Austria.

<sup>7</sup>Department of Pathology, University of Michigan, Ann Arbor, MI

Running title: Platelet PD-L1 and cancer

# Supplemental Figure 1

**a**

MC38 PD-L1 KO tumors

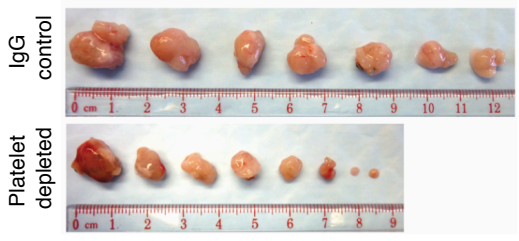

**b**

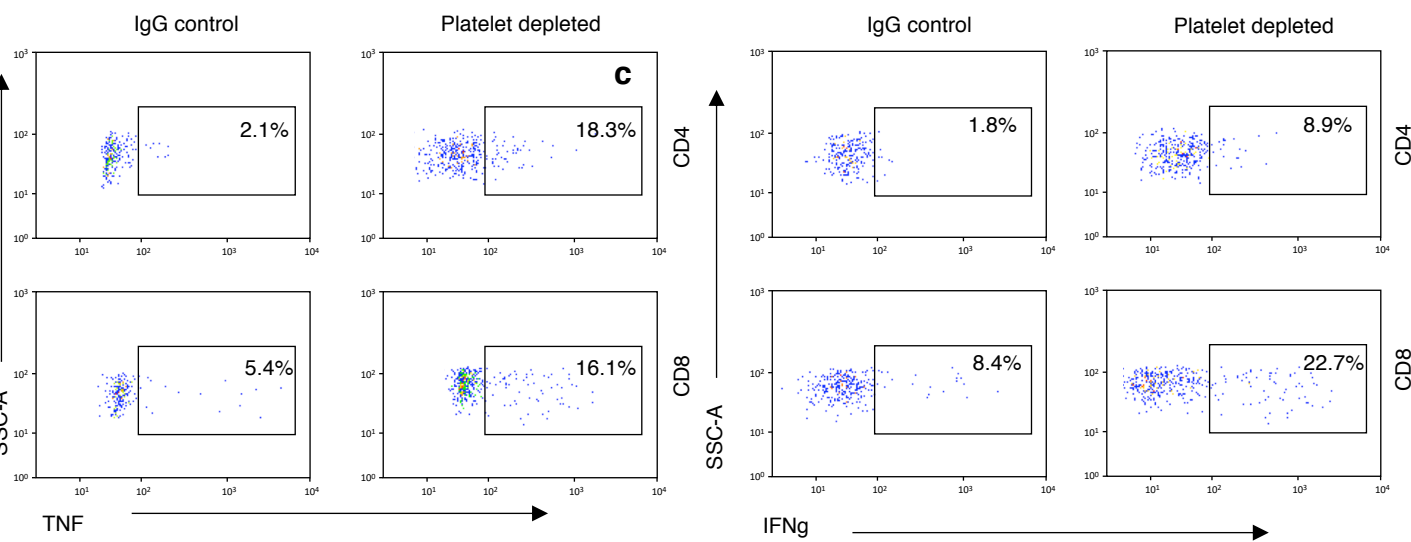

**c**

MC38 PD-L1 KO tumors

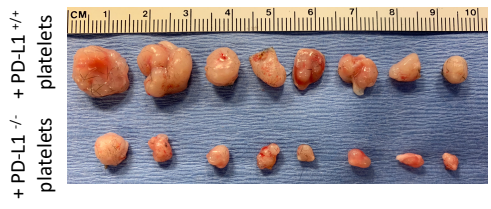

**d**

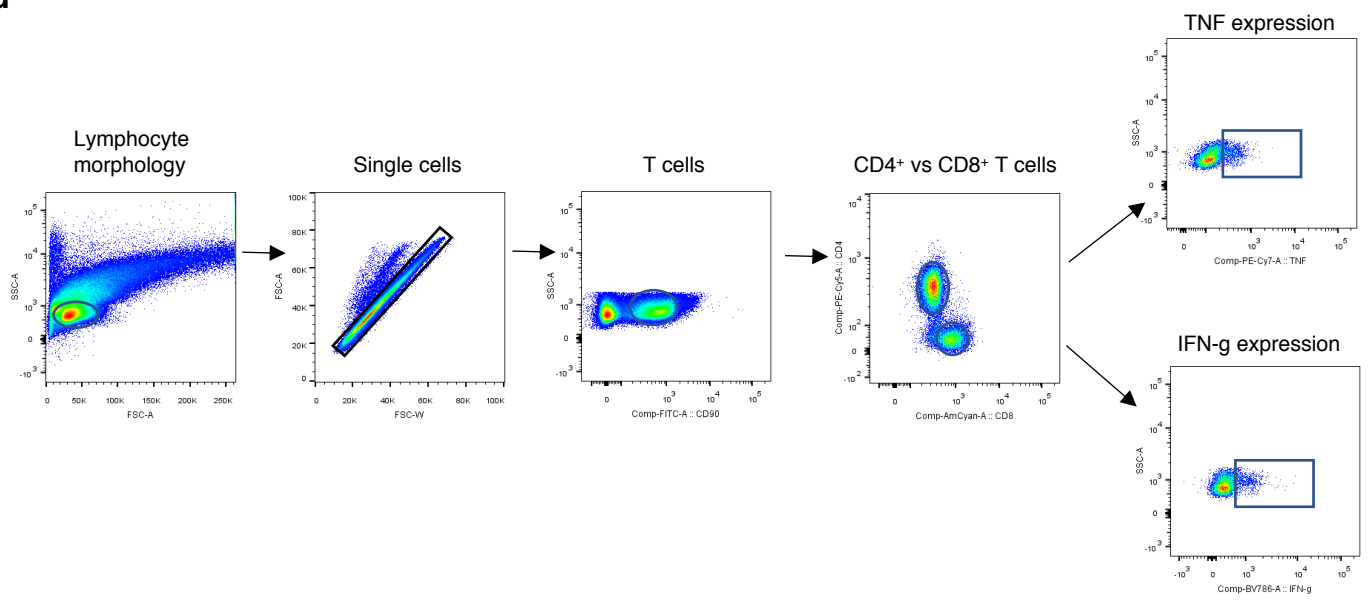

Supplemental Figure 2

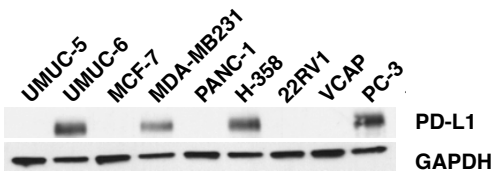

# Supplemental Figure 3

**a**

**cancer cells + platelets**

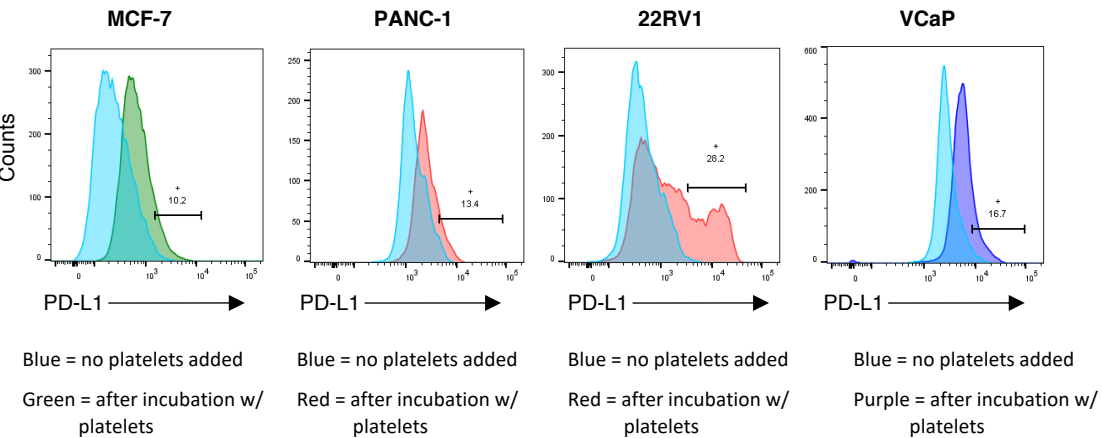

**b**

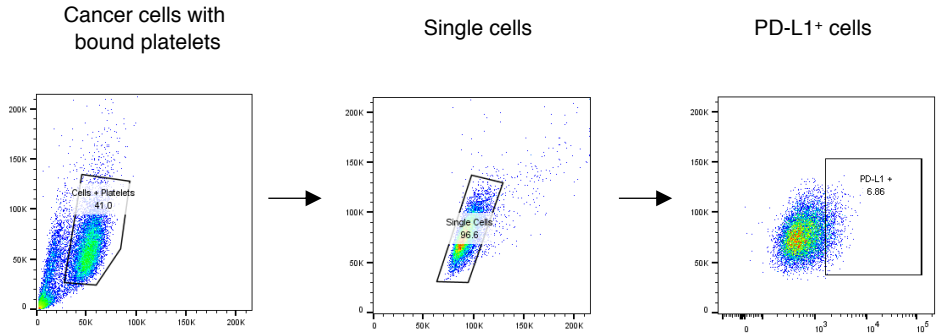

**c**

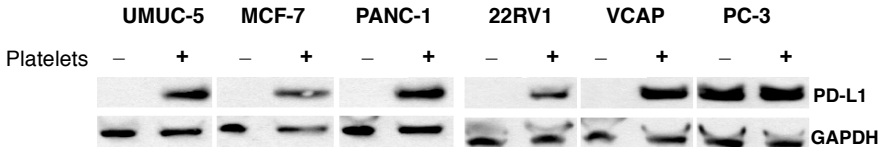



# Supplemental Figure 4

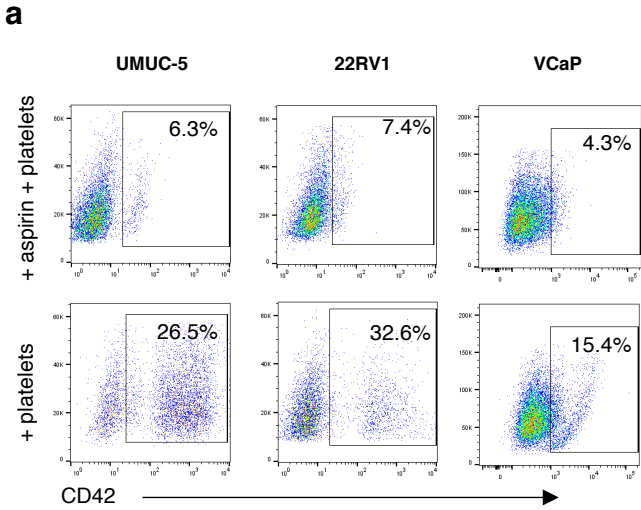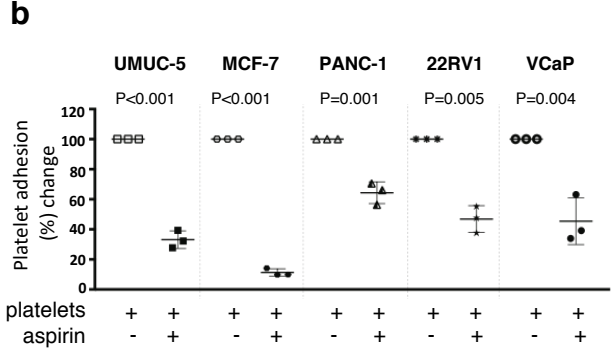

# Supplemental Figure 5

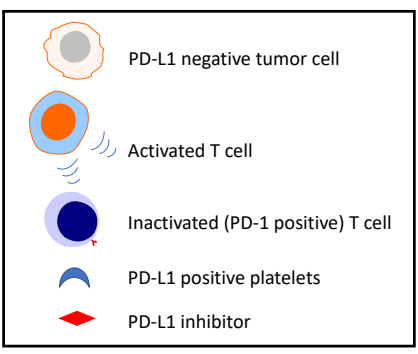

**a.**

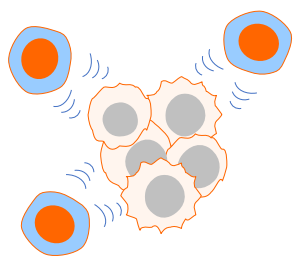

**b.**

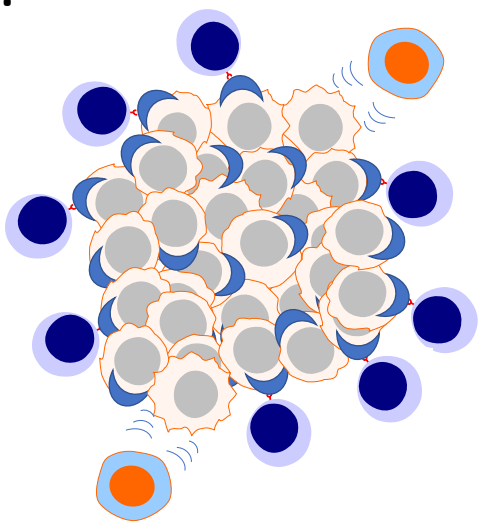

**c.**

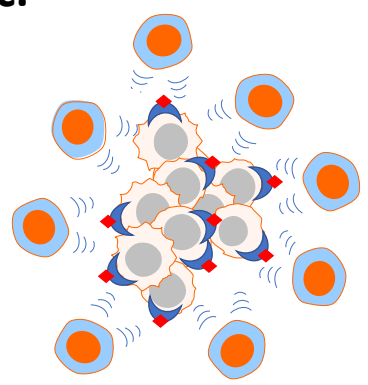

Figure 1 D

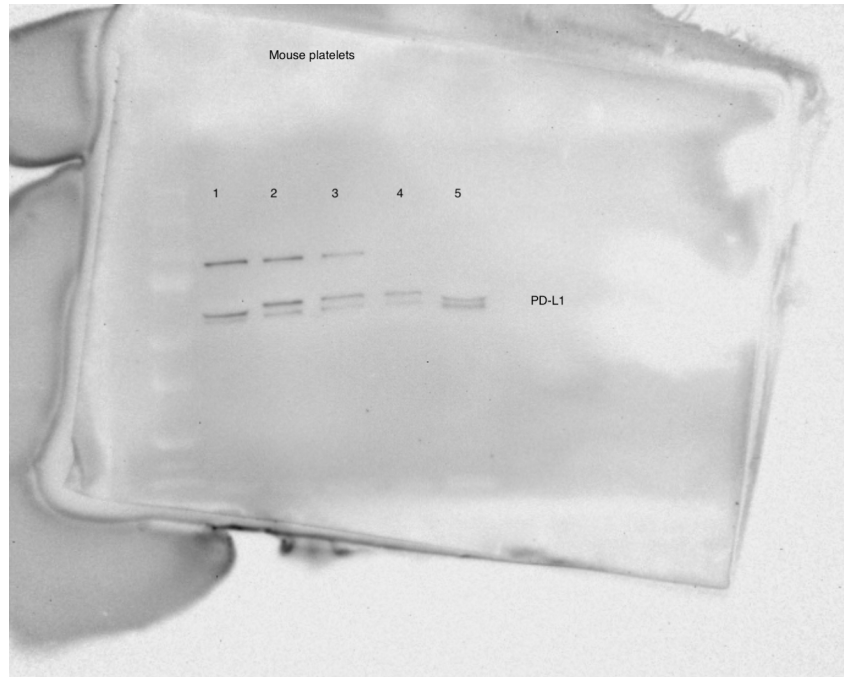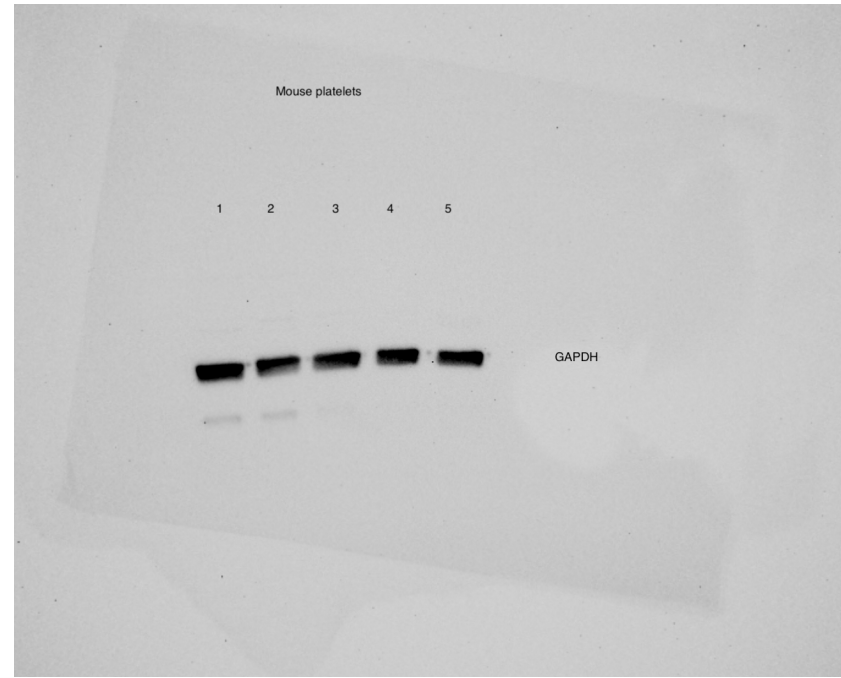

Figure 2 A

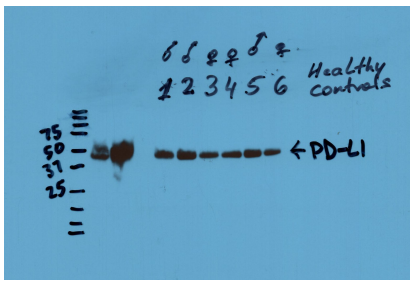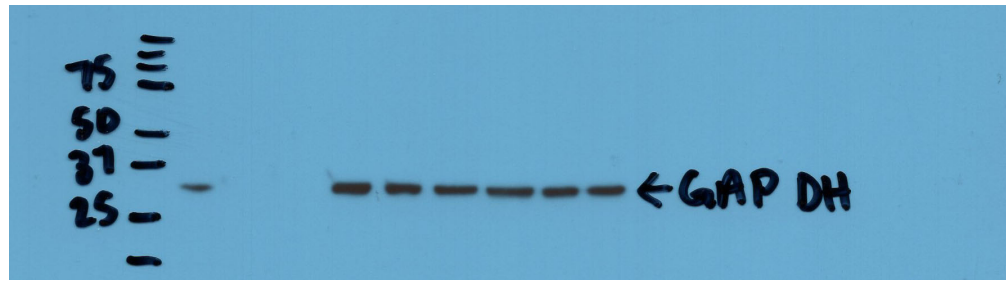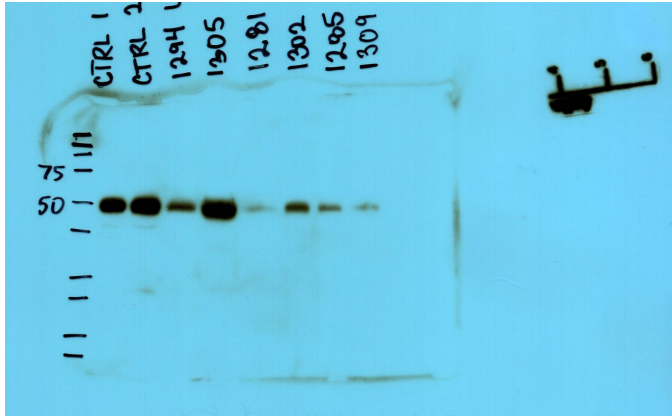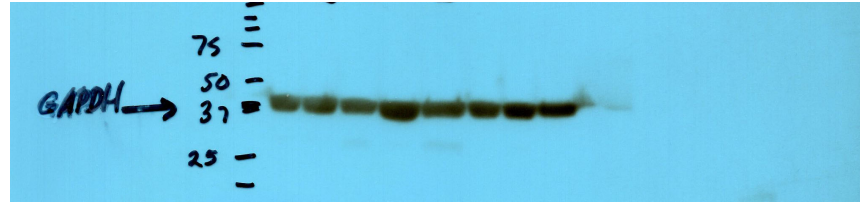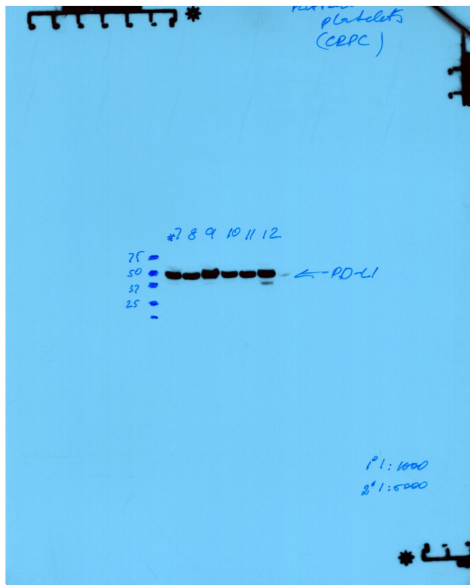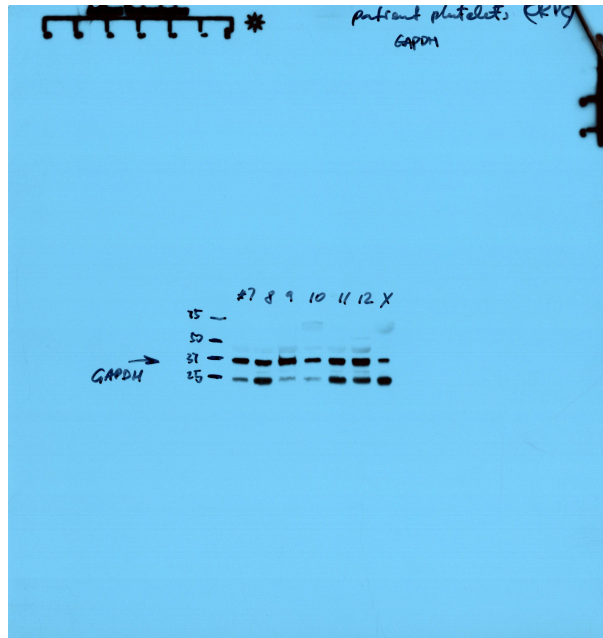

Supplemental Figure 2

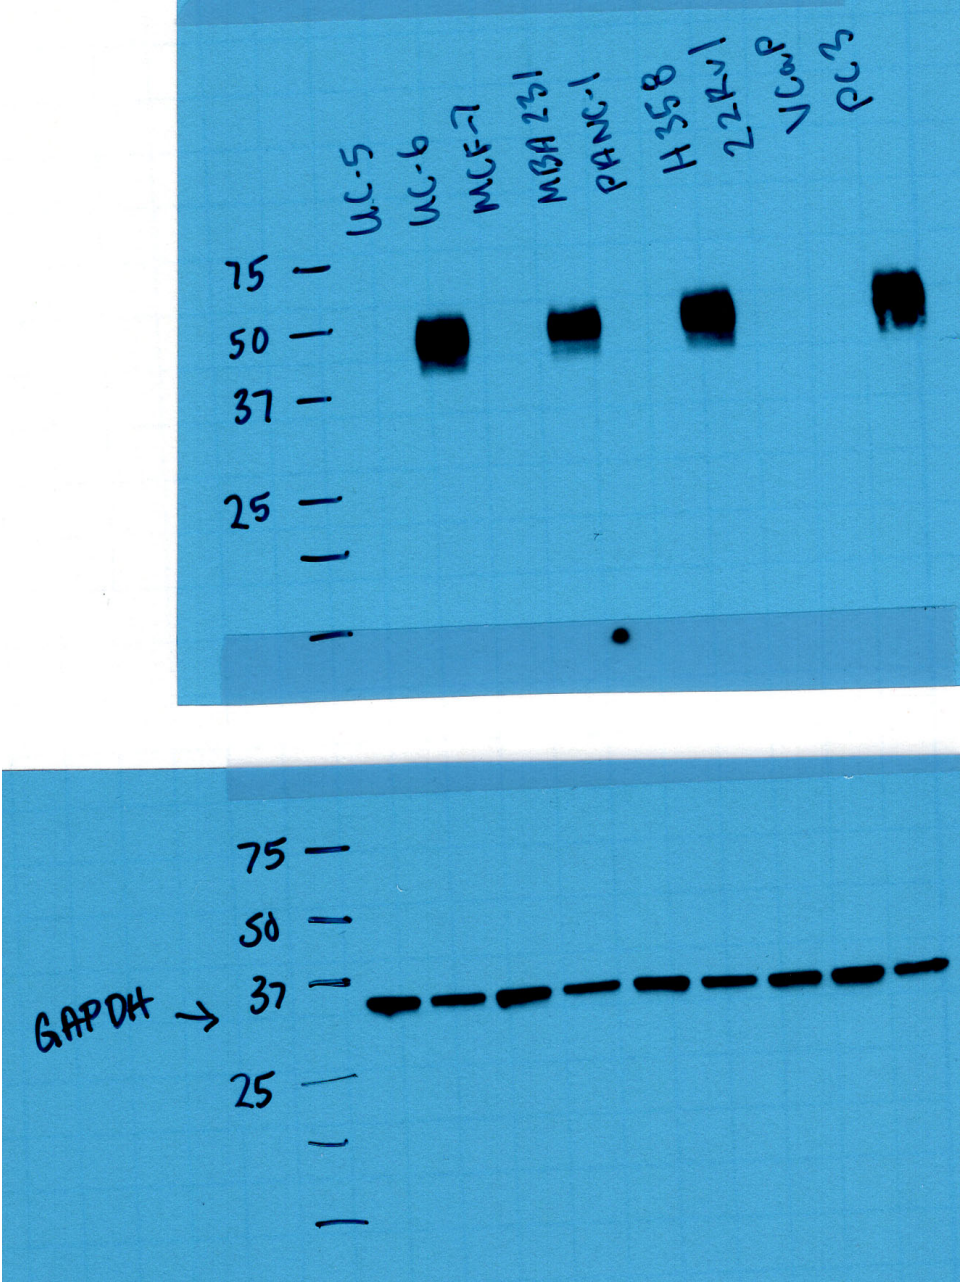



Supplemental Figure 3 C

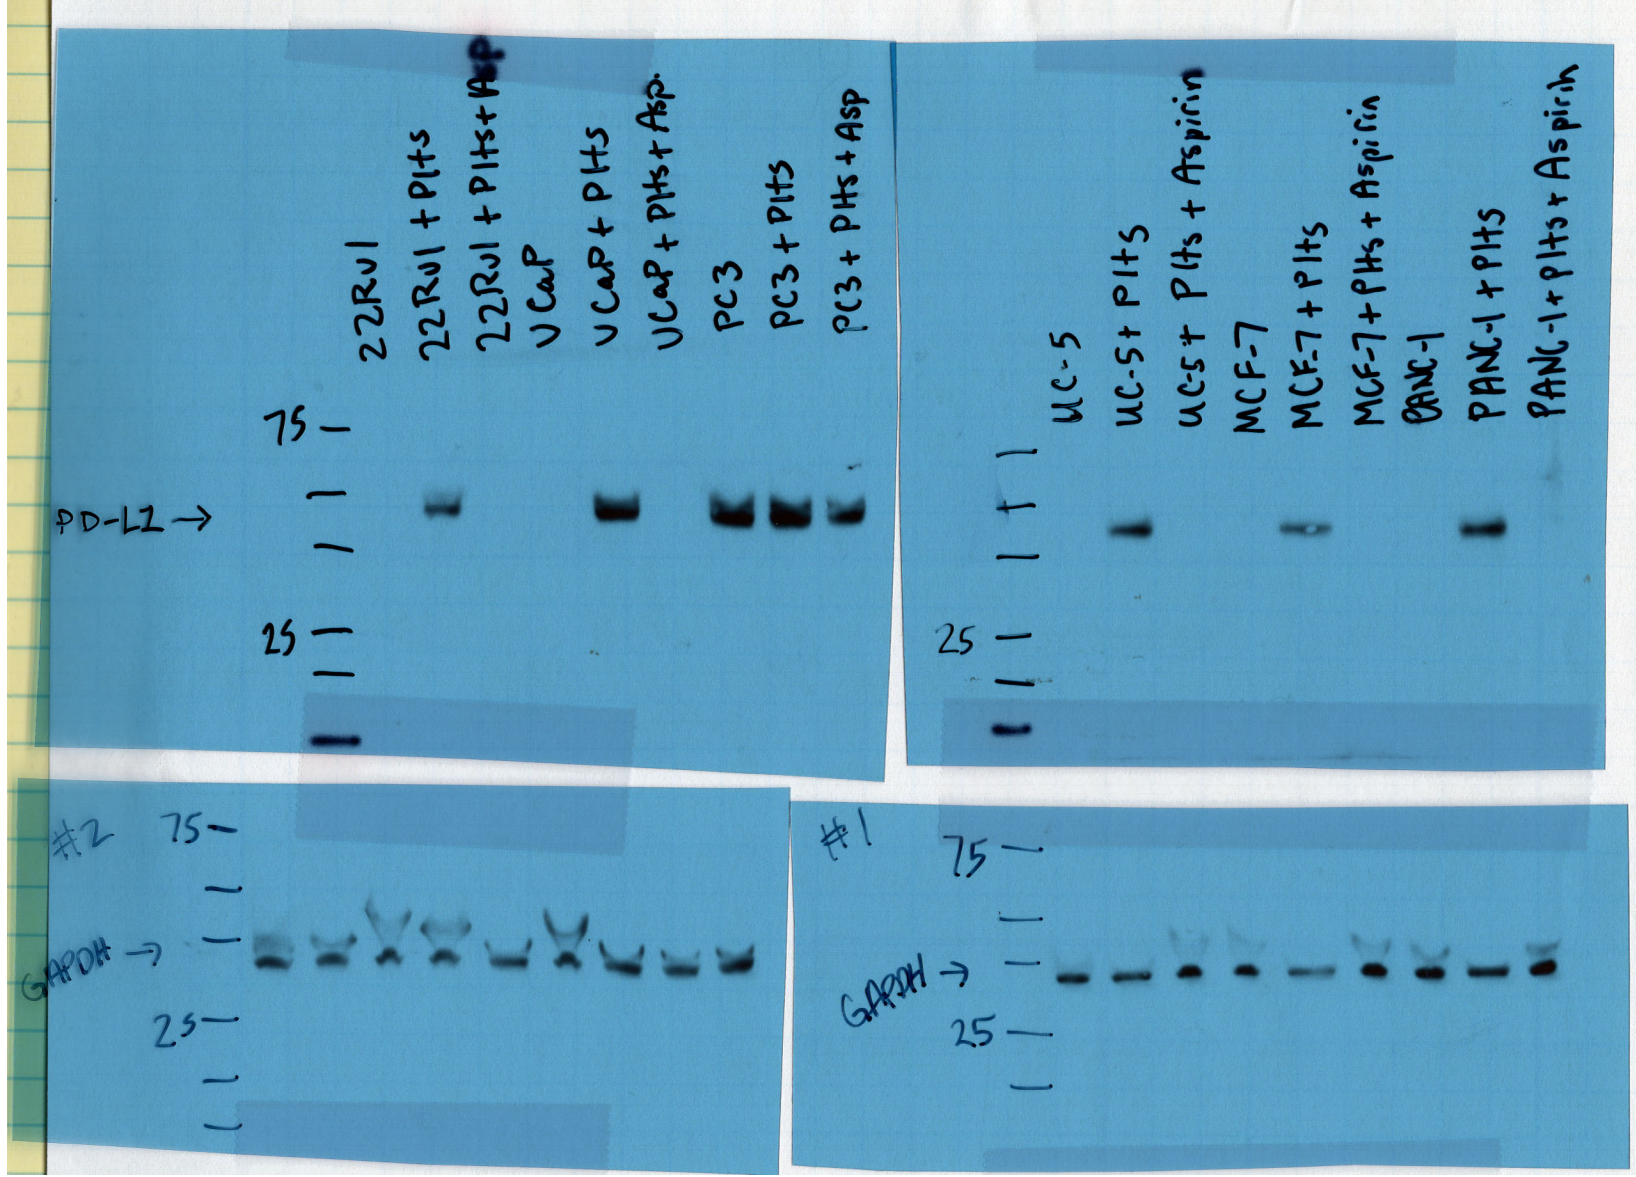

Supplement: 41598_2020_76351_MOESM2_ESM.pdf [file 41598_2020_76351_MOESM2_ESM.pdf]
